# Supplementary material for: Multinucleated Giant Cells Induced by a Silk Fibroin Construct Express Proinflammatory Agents: An Immunohistological Study
Source: MDPI journal article supplement (doi:10.3390/ma14144038), 2021-07-19
Supplement: s1 [file s1]

# Supplementary Materials: Multinucleated Giant Cells Induced by a Silk Fibroin Construct Express Proinflammatory Agents: An Immunohistological Study

Sarah Al-Maawi <sup>1,†</sup>, Xuejiu Wang <sup>2,†</sup>, Robert Sader <sup>1</sup>, Werner Götz <sup>3</sup>, Antonella Motta <sup>4</sup>, Claudio Migliaresi <sup>4</sup>, Charles James Kirkpatrick <sup>1</sup> and Shahram Ghanaati <sup>1,\*</sup>

<sup>1</sup> Department for Oral, Cranio-Maxillofacial and Facial Plastic Surgery, FORM (Frankfurt Orofacial Regenerative Medicine) Lab, University Hospital Frankfurt Goethe University, Theodor-Stern-Kai 7, 60590 Frankfurt am Main, Germany; sarah.Al-Maawi@kgu.de (S.A.-M.); R.Sader@em.uni-frankfurt.de (R.S.); kirkpatrick@uni-mainz.de (C.J.K.)

<sup>2</sup> Department of Oral and Maxillofacial Surgery, Capital Medical University School of Stomatology, Beijing 100050, China; wangxuejiu@126.com

<sup>3</sup> Center of Dento-Maxillo-Facial Medicine, Department of Orthodontics, University of Bonn, Welschnonnenstrasse 17, 53111 Bonn, Germany; wgoetz@uni-bonn.de

<sup>4</sup> Biotech research center and INSTM Unit, Department of Industrial Engineering, University of Trento, 38123 Trento, Italy; Antonella.motta@unitn.it (A.M.); claudio.migliaresi@unitn.it (C.M.)

\* Correspondence: Shahram.Ghanaati@kgu.de; Tel.: +49-69-6301-4492; Fax: +49-69-6301-3785

† Equal contribution.

Table S1: Statistical analysis comparing the differently polarized macrophages in the control group with the silk fibroin group at the different evaluation time points. Differences were considered statistically significant if the p values were \*p< 0.05 and highly significant if the p values were, \*\*p< 0.01, \*\*\*p< 0.001 or \*\*\*\*p<0.0001, n.s.: not significant.

| <b>Time point</b> | <b>iNOS</b>   | <b>CCR-7</b>  | <b>CD-206</b> | <b>CD-163</b> |
|-------------------|---------------|---------------|---------------|---------------|
| 3 days            | **** p<0.0001 | **** p<0.0001 | **** p<0.0001 | **** p<0.0001 |
| 10 days           | **** p<0.0001 | **** p<0.0001 | **** p<0.0001 | **** p<0.0001 |
| 15 days           | **** p<0.0001 | **** p<0.0001 | **** p<0.0001 | **** p<0.0001 |
| 30 days           | **** p<0.0001 | **** p<0.0001 | **** p<0.0001 | **** p<0.0001 |
| 60 days           | **** p<0.0001 | **** p<0.0001 | **** p<0.0001 | **** p<0.0001 |
| 90 days           | **** p<0.0001 | **** p<0.0001 | **** p<0.0001 | n.s.          |
| 120 days          | **** p<0.0001 | **** p<0.0001 | **** p<0.0001 | n.s.          |
| 180 days          | **** p<0.0001 | **** p<0.0001 | **** p<0.0001 | n.s.          |
